# Supplementary material
Source: publisher site journal article supplement (https://www.dovepress.com/article/344757)
Supplement: Supplementary file 1 [file get_supplementary_file.php]

**Supplementary Table 1. List of study sites and principal investigators**

| Study site (organization) | Principal investigator (name) |
| --- | --- |
| Nowon Eulji Medical Center | Sang-Hun Kim |
| Hanil General Hospital | Sang-Geun Ham |
| Sahmyook Medical Center | Mun-Bin Yoo |
| National Medical Center | Dong-Il Cho |
| Inje University Seoul Paik Hospital | Cheol-Hwan Kim |
| Severance Hospital | Sang-In Choi |
| Severance Hospital | Hee-Cheol Kang |
| Seoul Red Cross Hospital | Seok-Woo Kang |
| Soonchunhyang University Hospital Seoul | Ki-Up Kim |
| Dr. Park Family Clinic | Seung-Ho Park |
| Dr. Cho Internal Medicine Clinic | Ho-Jun Cho |
| Dr. Heo, Seong-Wook Internal Medicine Clinic | Seong-Wook Heo |
| Somang Clinic | Tae-Kyeong Kim |
| Dr. Park, Il-Rang Internal Medicine Clinic | Il-Rang Park |
| Dr. Lee, Seong-Bae Internal Medicine Clinic | Seong-Bae Lee |
| Seoul Dr. Song Internal Medicine Clinic | Min-Seop Song |
| Itaewon Cheil Clinic | Yeong-Gi Hong |
| Dr. Park, Tae-Eung Internal Medicine Clinic | Tae-Eung Park |
| Hye-Kwang Family Medicine Clinic | Seok-Hwan Yun |
| Dr. Jo Internal Medicine Clinic | Mi-Gyeong Kim |
| Dr. Ryu, Yeong-Jun Internal Medicine Clinic | Yeong-Jun Ryu |
| Dr. Kim, Yeon-Jong Internal Medicine Clinic | Yeon-Jong Kim |
| Dr. Choi, Gang-Sik Internal Medicine Clinic | Gang-Sik Choi |
| Seoul Jin Clinic | Jong-Guk Lee |
| Dr. Sin, Jung-Ho Internal Medicine Clinic | Jung-Ho Sin |
| Boram Association Clinic | Yong-Tae Kim |
| Inje University Ilsan Paik Hospital | Eon-Sook Lee |
| Dongguk University Ilsan Hospital | Jin-Yeong Oh |
| Ewha Womans University Medical Center Mokdong | Hong-Soo Lee |
| Incheon Christian Hospital | Gye-Seong Lee |
| Korea Worker's Compensation & Welfare Service Incheon Hospital | Jeong-Mi Kim |
| Dr. Lee Internal Medicine Clinic | Wook-Yong Lee |
| Seoul Bon Clinic | Gwi-Rae Lee |
| Dr. Park, Geun Tae Internal Medicine Clinic | Geun-Tae Park |
| Dr. Yang, Dae-Won Internal Medicine Clinic | Dae-Won Yang |
| Paul Clinic | Hyeon Sim |
| Ilsan Dr. Yoo Internal Medicine Clinic | Hye-Kyeong Yoo |
| Sebit Internal Medicine Clinic | Dong-Gyun Son |
| Ilsan St. Mary Internal Medicine Clinic | Jong-Gu Yun |
| Dr. Jeong Internal Medicine Clinic | Gyeong-Heon Jeong |
| Yonsei Family Medicine Clinic | Yong-Pyo Jeong |
| Dr. Moon, Hyeong-Han Internal Medicine Clinic | Hyeong-Han Moon |
| Sungmo Gil Clinic | Wook-Hyeon Gil |
| Dr. Seo, Jeong-Hwa Internal Medicine Clinic | Jeong-Hwa Seo |
| Best Family Medicine Clinic | Han-Gyu Cho |
| Dr. Park, Ji-Won Internal Medicine Clinic | Ji-Won Park |
| Seoul Medi Clinic | Yeong-Ju Kim |
| Dr. Yoo, Seok-Hwan Internal Medicine Clinic | Seok-Hwan Yoo |
| Joong-Ang Clinic | Jong-Sik Seo |
| Dr. Choi, Tae-Yeol Internal Medicine Clinic | Tae-Yeol Choi |
| Incheon Sarang Hospital | Gi-Hyeok Kang |
| Incheon Family Medicine Clinic | Hee-Sun Park |
| Incheon Family Medicine Clinic | Gyu-Jin Joo |
| Dr. Hong, Seong-Pyo Internal Medicine Clinic | Seong-Pyo Hong |
| Gangnam Severance Hospital | Se-Joong Rim |
| Chung-Ang University Yongsan Hospital | Ji-Hyeon Ahn |
| Ajou University Hospital | Jun-Han Shin |
| Ajou University Hospital | Nam-Seok Joo |
| Ajou University Hospital | Yoon-Sok Chung |
| Dr. Han, Ji-Yeop Urology Clinic | Ji-Yeop Han |
| Gangnam Best Clinic | Seung-Nam Lee |
| Daehang Hospital | Jong-Min Yun |
| Dr. Noh, Seong-Gap Internal Medicine Clinic | Seong-Gap Noh |
| Se-Yeon Internal Medicine Clinic | Gyeong-Hee Kim |
| Dr. Yun, Yeong-Seok Internal Medicine Clinic | Yeong-Seok Yun |
| Dr. Kim, Gyeong-Nyeon Internal Medicine Clinic | Gyeong-Nyeon Kim |
| Tower Urology Clinic | Jung-Woo Yoo |
| Dr. Kim, Ye-Won Internal Medicine Clinic | Ye-Won Kim |
| Dr. Moon, Hyeon-Chang Internal Medicine Clinic | Hyeon-Chang Moon |
| Dr. Wi, Sang-O Internal Medicine Clinic | Sang-O Wi |
| Myongji St. Mary’s Hospital | Yo-Sep Han |
| Dr. Baek, Geun-Wook Internal Medicine Clinic | Geun-Wook Baek |
| Yong Skin Hospital | Won-Yong Kim |
| Rodem Tree Internal Medicine Clinic | Hye-Seung Bang |
| Soo Internal Medicine Clinic | Cheol Moon |
| Shihwa Medical Center | Chang-Gyun Choi |
| Poo-Reun Internal Medicine Clinic | Gyu-Seok Shin |
| Heart & Digestive Disease Clinic | Cheol-Hyeon Kim |
| Sin-Yeong-Tong Samsung Internal Medicine Clinic | Jae-Eun Park |
| Yonsei Family Love Clinic | Seon-Man Kim |
| Dr.Park, Young-Bu Internal Medicine Clinic | Young-Bu Park |
| Yonsei Internal Medicine Clinic | Dong-Rip Kim |
| Ju Clinic | Eun-Ju Kim |
| Dr. Lee, Seong-Woo Internal Medicine Clinic | Seong-Woo Lee |
| Dr. Sohn, Kyeong-Soo Internal Medicine Clinic | Kyeong-Soo Sohn |
| Wonju Severance Christian Hospital | Suk-Joong Yong |
| Wonju Severance Christian Hospital | Seong-Ho Min |
| Dr. Lee, Myeong-Ho Internal Medicine Clinic | Myeong-Ho Lee |
| Delphoe Internal Medicine Clinic | Hee-Baek Park |
| Dr. Kim, Il-Hoe Internal Medicine Clinic | Il-Hoe Kim |
| Dr. Lee, Ok-Chan Internal Medicine Clinic | Ok-Chan Lee |
| Hanyang University Seoul Hospital | Hwan-Sik Hwang |
| Konkuk University Medical Center | Hui-Gyeong Joe |
| Kyung Hee University Hospital at Gangdong | Cheon-Woong Choi |
| Seoul National University Bundang Hospital | Choon-Taek Lee |
| Seoul National University Bundang Hospital | Jae-Ho Lee |
| Dr. Choi, Won-Jun Internal Medicine Clinic | Won-Jun Choi |
| Cham Sarang Internal Medicine Clinic | Yong-Beom Kim |
| Dr. Kang, Min-Mo Internal Medicine Clinic | Min-Mo Kang |
| Hang-Suk Internal Medicine Clinic | Gwang-Jae Park |
| Sinsung Internal Medicine Clinic | Seong-Tae Sin |
| Yonsei Family Medicine Clinic | Seong-Hyeon Choi |
| Yonsei Plaza Hospital | Hyun-Jun Sim |
| 21st Century Clinic | Su-Yeon Park |
| 21st Century Hospital | Han-Su Kim |
| Dr. In, Hyeon-Ho Internal Medicine Clinic | Hyeon-Ho In |
| Dr. Kook, Sang-Pyo Internal Medicine Clinic | Dong-Gyu Park |
| Gwanak Yonsei Clinic | Dae-Jin Lim |
| Seoul Samsung Internal Medicine Clinic | Sang-Soo Lee |
| Dr. Lee, Geon Internal Medicine Clinic | Geon Lee |
| Hanam Songdo Hospital | Jeong-Won Kang |
| Hyundae General Hospital | Yoo-Seok Jung |
| Geonggi Provincial Medical Center | Chul-Hee Park |
| Guri Yonsei Clinic | Yong-Jin Kim |
| Yonsei Jeil Clinic | Hyeong-Geun Lee |
| Hanyang Clinic | Chun-Sik Choi |
| Yonsei Family Clinic | Do-Won Kim |
| Konyang University Hospital | Byeong-Yeon Yoo |
| Konyang University Hospital | Mun-Jun Na |
| Chungbuk National University Hospital | Sie-Kyeong Kim |
| Dankook University Hospital | Yu-Seok Jeong |
| Konkuk University Chungju Hospital | Hyeok-Jung Kwon |
| Daejeon Eulji Medical Center, Eulji University | Gyeong-Jin Lee |
| Saeseoul Internal Medicine Clinic | Sang-Im Jeon |
| Saeseoul Internal Medicine Clinic | Gi-Sang Lee |
| Dr. Kim, Jong-Hak Internal Medicine Clinic | Jong-Hak Kim |
| Keun Sarang Clinic | Won-Sun Lee |
| Hanaro Clinic | Ji-Won Seo |
| Hongseong Medical Center | Jeong-Gon Yoo |
| Myeongcheon Family Medicine Clinic | Hwang-Yong Lee |
| Dr. Won, Jin-Ho Internal Medicine Clinic | Jin-Ho Won |
| Dangjin Sungmo Internal Medicine Clinic | Jae-Seon Choi |
| Dr. Sung Internal Medicine Clinic | Gi-Yang Sung |
| Yeolin Internal Medicine Hospital | Jung-Geun Kim |
| Angel Association Internal Medicine Clinic | Tae-Geun Kang |
| Cheong Ju Medical Center | Gyeong-Sook Lee |
| Dr. Son, Gyeong-Rak Internal Medicine Clinic | Gyeong-Rak Son |
| Hyundae Association Clinic | Seung-Ju Lee |
| Jejung Internal Medicine Clinic | Won-Tae Lee |
| Chonnam National University Hospital | Yu-Il Kim |
| Chonnam National University Hwasun Hospital | Kyu-Sik Kim |
| Cheomdan Medical Center | Gi-Dong Yoo |
| Dr. Yang, Seung-Jin Internal Medicine Clinic | Seung-Jin Yang |
| Dr. Kang Internal Medicine Clinic | Hyeong-Gu Kang |
| Mediflower Urology Clinic | Gil-Yong Lee |
| Han Joong Family Medicine Clinic | Jong-Myeong Lim |
| Green Family Medicine Clinic | Yeong-Do Yang |
| Mediflower Internal Medicine Clinic | Myeong-Seop Ahn |
| Dr. Han, Jeong-Ryeol Internal Medicine Clinic | Jeong-Ryeol Han |
| Yonsei Internal Medicine clinic | Byeong-Gi Choi |
| Dr. Seon Internal Medicine Clinic | Yeong-Deok Seon |
| Dr. Ryu, Ho-Jeong Internal Medicine Clinic | Ho-Jeong Ryu |
| Dr. Yoo, Byeong-Jeon Internal Medicine Clinic | Byeong-Jeon Yoo |
| Dr. Lim, Won-Seop Internal Medicine Clinic | Won-Seop Lim |
| Yeo Cheon Cheon Nam Hospital | Gyu-Rak Jeon |
| Sunchon Jungang Hospital | Hyeon-Hwa Son |
| Mokpo Medical Center | Jae-Hong Park |
| Joo Min Clinic | Il-Sik Kim |
| Wonkwang Univeristy Hospital | Se-Hoon Yang |
| Presbyterian Medical Center | Chung-Hwan Cho |
| Dr. Jang, Hee-Seong Internal Medicine Clinic | Hee-Seong Jang |
| Dr. Park, Sang-Bae Internal Medicine Clinic | Sang-Bae Park |
| Dr. Seo, Gyeong-Rak Family Medicine Clinic | Gyeong-Rak Seo |
| Jeonju-Si Public Health Center | Hyeong-Ju Sin |
| Gospel Association Internal Medicine Clinic | Deok-Soo Cho |
| Jeollabuk-do Namwon Medical Center | Gang-Min Bae |
| Kyungpook National University Hospital | Chang-Ho Yoon |
| Kyungpook National University Hospital | Tae-Hun Jeong |
| Keimyung University Dongsan Medical Center | Dae-Hyun Kim |
| Yeungnam University Medical Center | Kwan-Ho Lee |
| Yeungnam University Medical Center | Jin-Hong Jeong |
| Daegu Catholic University Medical Center | Jin-Bae Lee |
| Seong Seo Hospital | Dae-Gu Jin |
| Daegu Veterans Hospital | Hyeon-Jin Kim |
| Daegu Mental Hospital | Nam-Hui Kim |
| Han Family Medical Center | Jin-Yeong Lee |
| Dongboo HUH Hospital | Gwang-Sik Choi |
| Park Hyeon Internal Medicine Clinic | Yun-Hyeon Park |
| Dr. Yun, Yeong-Gil Internal Medicine Clinic | Yeong-Gil Yun |
| Daehan Internal Medicine Clinic | Su-Hyeong Lee |
| Dr. Ha, Seung-Woo Internal Medicine Clinic | Seung-Woo Ha |
| Daegu Medical Center | Seok-Hwan Lee |
| Dr. Hwang, Hyeong-Gi Internal Medicine Clinic | Hyeong-Gi Hwang |
| Dr. Jeong, Hong-Soo Internal Medicine Clinic | Hong-Soo Jeong |
| Dr. Kim, Yang-Sik Internal Medicine Clinic | Yang-Sik Kim |
| Dr. Lee, Jong-Gon Internal Medicine Clinic | Jong-Gon Lee |
| Sok Hepato-Gastroenterology Clinic Center | Si-Ok Jeong |
| Good Sunlin Hospital | Byeong-Gang Park |
| Andong Sungso Hospital | Jun-Hyeok Choi |
| Dr. Kim, Ki-Tae Family Medicine Clinic | Ki-Tae Kim |
| Dr. Ahn, Hyeong-Woo Family Medicine Clinic | Hyeong-Woo Ahn |
| Han Maum Internal Medicine Clinic | Wook-Hwan Gwak |
| Dr. Kwak, Cheol-Seung Internal Medicine Clinic | Cheol-Seung Kwak |
| Dr. Seo, Jung-Chul Internal Medicine Clinic | Jung-Chul Seo |
| East Masan Hospital | Hae-Gyun Lee |
| Bando Hospital | Gi-Ryang Kim |
| Cham Pyeonhan Family Medicine Clinic | Gyeong-Won Park |
| Tong Que Han Family Medicine Clinic | Woo-Sang Kim |
| Pusan National University Hospital | Yun-Jin Kim |
| Dong-A University Hospital | Seong-Ho Han |
| Inje University Busan Paik Hospital | Jun-Su Kim |
| Daedong Hospital | Gwang-Jae Lee |
| Daedong Hospital | Dong Heo |
| Dong Rae Bong Seng Hospital | Yong-Hwan Lee |
| Namsan Internal Medicine Clinic | Bong-Chun Lee |
| Myeong Seong Clinic | Chung-Hwan Choi |
| Dr. Kim, Yong-Gyun Internal Medicine Clinic | Yong-Gyun Kim |
| Ja-Hye Internal Medicine Clinic | Jae-Heon Kim |
| Busan Medical Center | Jeon-Su Park |
| Dr. Kang Internal Medicine Clinic | Pil-Jung Kang |
| Dr. Jeong Internal Medicine Clinic | Yong-Ho Jeong |
| Isam Hospital | Seong-Geun Lee |
| Dr. Kim, Dae-Yeon Internal Medicine Clinic | Dae-Yeon Kim |
| Hong Family Medicine Clinic | In-Bok Hong |
| Samsung Internal Medicine MRI Image Informatics Clinic | In-Ho Park |
| Dr. Jeong Internal Medicine Clinic | Gwang-Ho Jeong |
| Geo-Boong Baik Medical Center | Dong-Joo Song |
| Han Maum Surgery Clinic | Seok Lee |
| Dr. Choi, Tae-Ryong Internal Medicine Clinic | Tae-Ryong Choi |
| 21 Century Jo-Eun Hospital | Yeong-Hwan Choi |
| Dr. Kim, Bok-Geun Internal Medicine Clinic | Bok-Geun Kim |
| Dr. Kim, Yong-Gi Internal Medicine Clinic | Yong-Gi Kim |
| Ulsan University Hospital | Moon-Chan Kim |
| Hankook General Hospital | Seon-Jeong Kim |
| Cheju Halla General Hospital | Jeong-Hyeon Oh |
| Jeju National University Hospital | Jae-Cheon Lee |
| Dr. Kim, Eun-Yeong Internal Medicine Clinic | Eun-Yeong Kim |
| Chonnam National University Hwasun Hospital | In-Jae Oh |
| Hee-Rak Seoul Family Medicine Clinic | Sang-Yong Lee |
| Iksan Hospital | Jin-Su Hwang |
| Inje University Sanggye Paik Hospital | Gyu-Nam Kim |
| Kyung Hee University Medical Center | Jang-Won Won |
| Kyung Hee University Medical Center | Byung-Seong Kim |
| Kyung Hee University Medical Center | Myung-Jae Park |
| Severance Hospital | Jin-Wook Moon |
| Soonchunhyang University Hospital | Joo-Youn Cho |
| Soonchunhyang University Hospital | Byung-Wook Yoo |
| Soonchunhyang University Hospital | Sung-Ho Hong |
| Korea Worker's Compensation & Welfare Service Incheon Hospital | Seon-Gon Kim |
| Inha University Hospital | Ji-Ho Choi |
| Hallym University Kangnam Sacred Heart Hospital | Min-Kyu Choi |
| Wonju Severance Christian Hospital | Jong-Koo Kim |
| Wonju Severance Christian Hospital | Sang-Ha Kim |
| Wonju Severance Christian Hospital | Won-Yeon Lee |
| Wonju Severance Christian Hospital | Seung-Hwan Lee |
| Hallym University Chuncheon Sacred Heart Hospital | Myung-Goo Lee |
| Hallym University Chuncheon Sacred Heart Hospital | Chang-Youl Lee |
| Asan Medical Center | Seung-Won Na |
| Asan Medical Center | Kwang-Ha Lee |
| Asan Medical Center | Young-Ju Jeong |
| Asan Medical Center | Chang-Min Choi |
| Asan Medical Center | Jin-Woo Song |
| Hallym University Sacred Heart Hospital | Yu-Jin Baek |
| Hallym University Sacred Heart Hospital | Sang-Ho Yoo |
| The Catholic University of Korea Daejeon St. Mary’s Hospital | Gang-Geon Lee |
| Daejeon Eulji Medical Center, Eulji University | Yang-Deok Lee |
| Soonchunhyang University Cheonan Hospital | Gi-Hyeon Seo |
| Cheongju Catholic Medical Center | Jin-Young Ahn |
| Daejeon Hankook Hospital | Gyeong-Min Kim |
| Hanvitz Internal Medicine Clinic | Du-Yong Lee |
| Buyeo Central Hospital | Jeong-Gyeong Yang |
| Kyung Hee Clinic | Yong-Hwa Jeon |
| Dr. Kim, Tae-Ryong Internal Medicine Clinic | Tae-Ryong Kim |
| Cr. Oh, Mi-Hee Internal Medicine Clinic | Mi-Hee Oh |
| Miz And Me Clinic | Gyeong-Mi Kim |
| Wonkwang University Hospital | Sae-Ron Sin |
| Jeonbuk National University Hospital | Won-Ho Kim |
| Jeonbuk National University Hospital | Yang-Geun Lee |
| JeongEup Asan Hospital | Jong-Hun Jeong |
| JeongEup Asan Hospital | Jin-Hee Lee |
| Suncheon Hankook Hospital | Gye-Seong Hwang |
| St. Carollo Hospital | Eun-Woo Lee |
| Sejong General Hospital | Chan-Ok Choi |
| Mokpo Medical Center | Tae-Won Yun |
| Mokpo Hankook Hospital | Dong-Gu Kang |
| Jeollabuk-do Namwon Medical Center | Eun-Gyeong Park |
| Changwon Fatima Hospital | Jung-Rae Park |
| Daegu Catholic University Medical Center | Sang-Chae Lee |
| Gyeongsang National University Hospital | I-Yeong Jeong |
| Yeungnam University Medical Center | Geun-Mi Lee |
| Pusan National University Hospital | Yeong-Ju Kim |
| Dong-A University Hospital | Chun-Hui Son |
| Kosin University Gospel Hospital | Jong-Sun Choi |
| Busan St. Mary’s Hospital | Jae-Sik Jang |
| Dong-Eui Medical Center | Sang-Chan Lee |
| Ulsan University Hospital | Cheol-In Yoo |
| Ulsan University Hospital | Sam-Wook Choi |
| Cheju Halla General Hospital | Seung-Ho Kang |
| Ewha Women University Medical Center Mokdong | Eun-Mi Chon |
| Busan Wallace Memorial Baptist Hospital | Jun-Sang Lee |
| Soonchunhyang University Bucheon Hospital | Do-Jin Kim |
| Soonchunhyang University Bucheon Hospital | Jong-Sook Park |
| Samsung Changwon Hospital | Jun-Seok Son |
| Keimyung University Dongsan Medical Center | Young-June Jeon |
| Daegu Fatima Hospital | Yeon-Jae Kim |
| Soonchunhyang University Gumi Hospital | Hyeon-Gyu Hwang |
| Dongguk University Ilsan Hospital | Yu-Il Kim |

Supplementary Table 2. Total administration period and dose of varenicline

|  |  | N = 3,719 |
| --- | --- | --- |
|  |  | Total, n (%) |
| Total administration period | Mean ± SD (day) | 52.9 ± 32.3 |
| Median | 44.0 |
| Range | 3.0 - 289.0 |
| <4 weeks | 865 (23.3) |
| 4 weeks to <8 weeks | 1,197 (32.2) |
| ≥8 weeks | 1,657 (44.5) |
| Total administration dosea | Mean ± SD (mg) | 94.2 ± 63.5 |
| Median | 75.5 |
| Range | 1.5–578.0 |

aMean daily dose of varenicline was 1.68 ± 0.3 mg in the safety analysis set.

N = total number of subjects, n = number of subjects

SD = standard deviation

**Supplementary Table 3. Adverse events in the order of frequency with severity profile**

| Events | Number of AEsa | | Severity | | |
| --- | --- | --- | --- | --- | --- |
| N | % | Mild | Moderate | Severe |
| Nausea | 191 | 41.2 | 157 | 31 | 3 |
| Dyspepsia | 30 | 6.5 | 21 | 8 | 1 |
| Abnormal dreams | 30 | 6.5 | 25 | 5 | 0 |
| Insomnia | 30 | 6.5 | 28 | 2 | 0 |
| Headache | 26 | 5.6 | 20 | 5 | 1 |
| Fatigue/malaise/adynamia | 17 | 3.7 | 12 | 5 | 0 |
| Sleep disorder | 14 | 3.0 | 11 | 3 | 0 |
| Abdominal pain | 13 | 2.8 | 10 | 3 | 0 |
| Constipation | 12 | 2.6 | 9 | 3 | 0 |
| Decreased appetite | 10 | 2.2 | 7 | 3 | 0 |
| Vomiting | 9 | 1.9 | 7 | 2 | 0 |
| Somnolence | 9 | 1.9 | 8 | 1 | 0 |
| Depression | 8 | 1.7 | 4 | 4 | 0 |
| Nightmare | 6 | 1.3 | 3 | 3 | 0 |
| Increased appetite | 6 | 1.3 | 5 | 1 | 0 |
| Pruritus | 5 | 1.1 | 3 | 2 | 0 |
| Dizziness | 5 | 1.1 | 3 | 1 | 1 |
| Dry mouth | 4 | 0.9 | 4 | 0 | 0 |
| Rash | 4 | 0.9 | 2 | 2 | 0 |
| Dyspnea | 3 | 0.6 | 2 | 1 | 0 |
| Abdominal pain upper | 2 | 0.4 | 1 | 1 | 0 |
| Flatulence | 2 | 0.4 | 2 | 0 | 0 |
| Dysgeusia | 2 | 0.4 | 2 | 0 | 0 |
| Gastroesophageal reflux disease | 1 | 0.2 | 1 | 0 | 0 |
| Gingival edema | 1 | 0.2 | 0 | 1 | 0 |
| Mouth ulceration | 1 | 0.2 | 0 | 1 | 0 |
| Epigastric discomfort | 1 | 0.2 | 0 | 1 | 0 |
| Hallucination | 1 | 0.2 | 0 | 1 | 0 |
| Anxiety | 1 | 0.2 | 1 | 0 | 0 |
| Suicidal ideation | 1 | 0.2 | 0 | 1 | 0 |
| Abnormal thoughts | 1 | 0.2 | 1 | 0 | 0 |
| Cerebral artery stenosis | 1 | 0.2 | 0 | 0 | 1 |
| Mental impairment | 1 | 0.2 | 0 | 0 | 1 |
| Neuritis | 1 | 0.2 | 0 | 0 | 1 |
| Dreamy state | 1 | 0.2 | 1 | 0 | 0 |
| Syncope | 1 | 0.2 | 0 | 1 | 0 |
| Chest discomfort | 1 | 0.2 | 1 | 0 | 0 |
| Chest pain | 1 | 0.2 | 0 | 1 | 0 |
| Productive cough | 1 | 0.2 | 1 | 0 | 0 |
| Nasopharyngitis | 1 | 0.2 | 1 | 0 | 0 |
| Pneumonia | 1 | 0.2 | 0 | 1 | 0 |
| Rhinitis | 1 | 0.2 | 1 | 0 | 0 |
| Upper respiratory tract infection | 1 | 0.2 | 1 | 0 | 0 |
| Alanine aminotransferase increased | 1 | 0.2 | 0 | 1 | 0 |
| Aspartate aminotransferase increased | 1 | 0.2 | 0 | 1 | 0 |
| Myalgia | 1 | 0.2 | 1 | 0 | 0 |
| Nipple pain | 1 | 0.2 | 1 | 0 | 0 |
| Hypertension | 1 | 0.2 | 1 | 0 | 0 |
| Lung neoplasm malignant | 1 | 0.2 | 0 | 1 | 0 |
| Total | 464 | 100.0 | 358 | 97 | 9 |

aSAEs were not counted and one subject could report more than one AE.

AE = adverse event, SAE = serious adverse event

**Supplementary Table 4. Comparison of baseline characteristics between study subjects who completed the study and who discontinued the study**

|  | | Study completers (N = 1,165), n (%) | Study discontinuers (N = 2,554), n (%) | p-valuea |
| --- | --- | --- | --- | --- |
| Sex | Male | 1,062 (91.2) | 2,317 (90.7) | 0.6670 |
| Female | 103 (8.8) | 237 (9.3) |
| Age | 18–44 | 401 (34.4) | 863 (33.8) | 0.2119 |
| 45–64 | 647 (55.5) | 1,284 (54.2) |
| ≥65 | 117 (10.0) | 307 (12.0) |
| Mean ± SD (range) | 48.9 ± 11.3 (18–82) | 49.6 ± 11.9 (19–86) | 0.1175 |
| Number of drinks per weekb | None | 219 (18.8) | 514 (20.1) | 0.3499 |
| 1–2 | 711 (61.0) | 1,494 (58.5) |
| ≥3 | 235 (20.2) | 545 (21.3) |
| Age at smoking initiationb (years) | <15 | 30 (2.6) | 91 (3.6) | 0.2484 |
| 15–20 | 511 (43.9) | 1,083 (42.4) |
| 21–30 | 598 (51.3) | 1,305 (51.1) |
| Others | 26 (2.2) | 74 (2.9) |
| Average smoking amount per day (packs)c | <1 | 363 (31.2) | 841 (32.9) | 0.2891 |
| 1–2 | 664 (57.0) | 1,454 (56.9) |
| 2–3 | 133 (11.4) | 246 (9.6) |
| Others | 4 (0.3) | 13 (0.5) |
| Number of attempts to quit smokingd | None | 335 (28.8) | 640 (25.1) | 0.1040 |
| Once | 224 (19.3) | 505 (19.8) |
| 2–4 times | 429 (36.9) | 984 (38.6) |
| ≥5 times | 174 (15.0) | 422 (16.5) |
| Allergy history | No | 1,148 (98.5) | 2,523 (98.8) | 0.5385 |
| Yes | 17 (1.5) | 31 (1.2) |
| Comorbidity | No | 620 (53.2) | 1,372 (53.7) | 0.7764 |
| Yes | 545 (46.8) | 1,182 (46.3) |
| Concomitant medication | No | 671 (57.6) | 1,562 (61.2) | 0.0397 |
| Yes | 494 (42.4) | 992 (38.8) |

ap-value was calculated using t-test for mean age difference. Chi-square test was used for the others.

bOne missing from study discontinuers group.

cOne missing from study completers group.

dThree missing from study completers group and three missing from study discontinuers group.
